# Supplementary material for: A Network-Based Gene Expression Signature Informs Prognosis and Treatment for Colorectal Cancer Patients
Source: PubMed Central journal article supplement (PMC3402487; doi:10.1371/journal.pone.0041292), 2012-07-23
Supplement: pone.0041292.s001.pdf [file pone.0041292.s001.pdf]

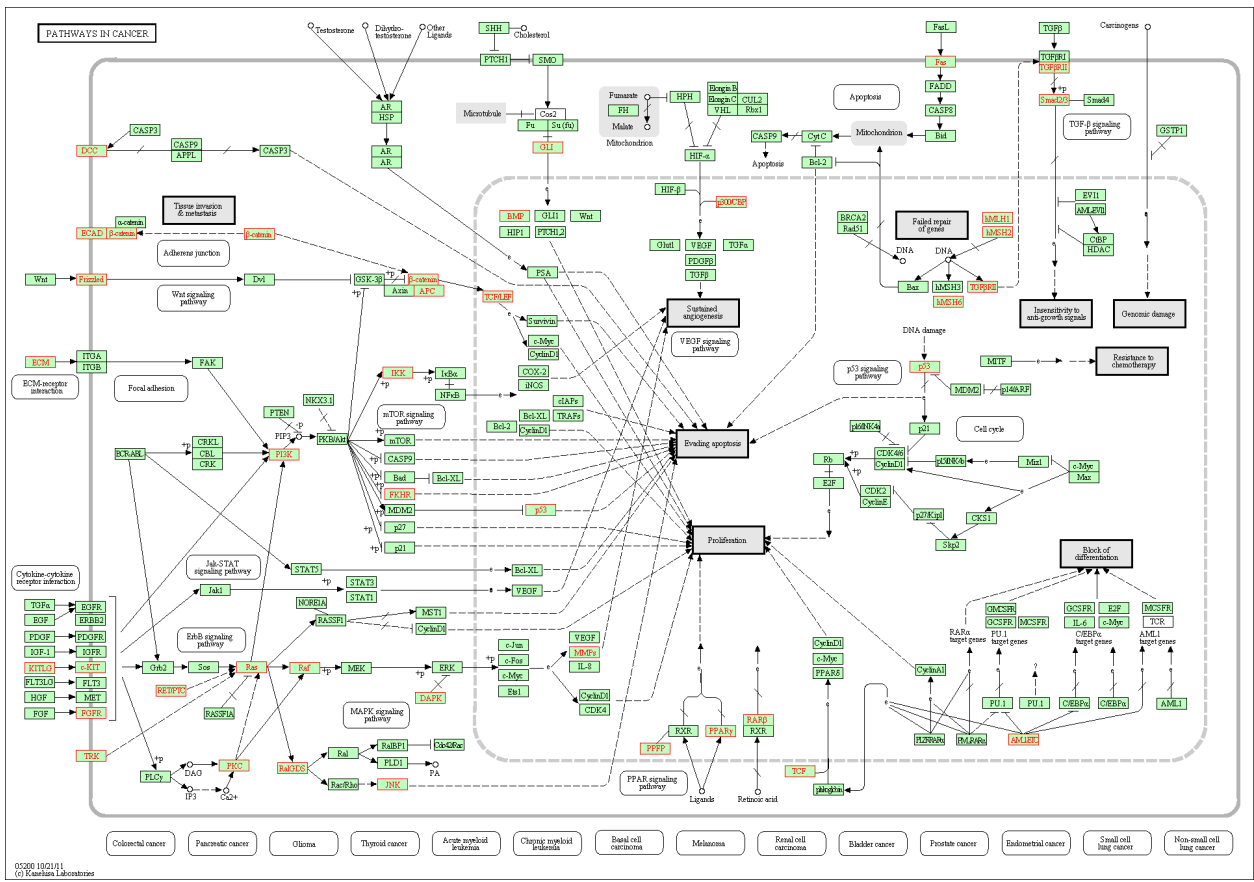

Figure S1. Pathways in cancer (from KEGG) with genes in the MEN signature highlighted in red.
